# Supplementary material
Source: Springer Nature journal article supplement (https://www.springermedizin.de/resource/supplementary/13002_2013_384_MOESM4_ESM.pdf/9626858)

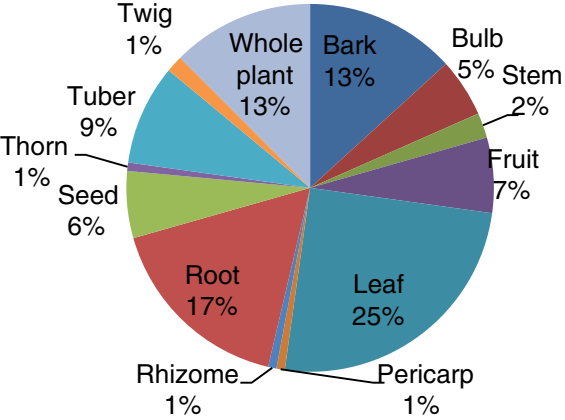

Supplement: MOESM4 [file 9626858]
